# Supplementary material
Source: PubMed Central journal article supplement (PMC1315398)

Goodliffe, Supplementary Figure 1

**A**

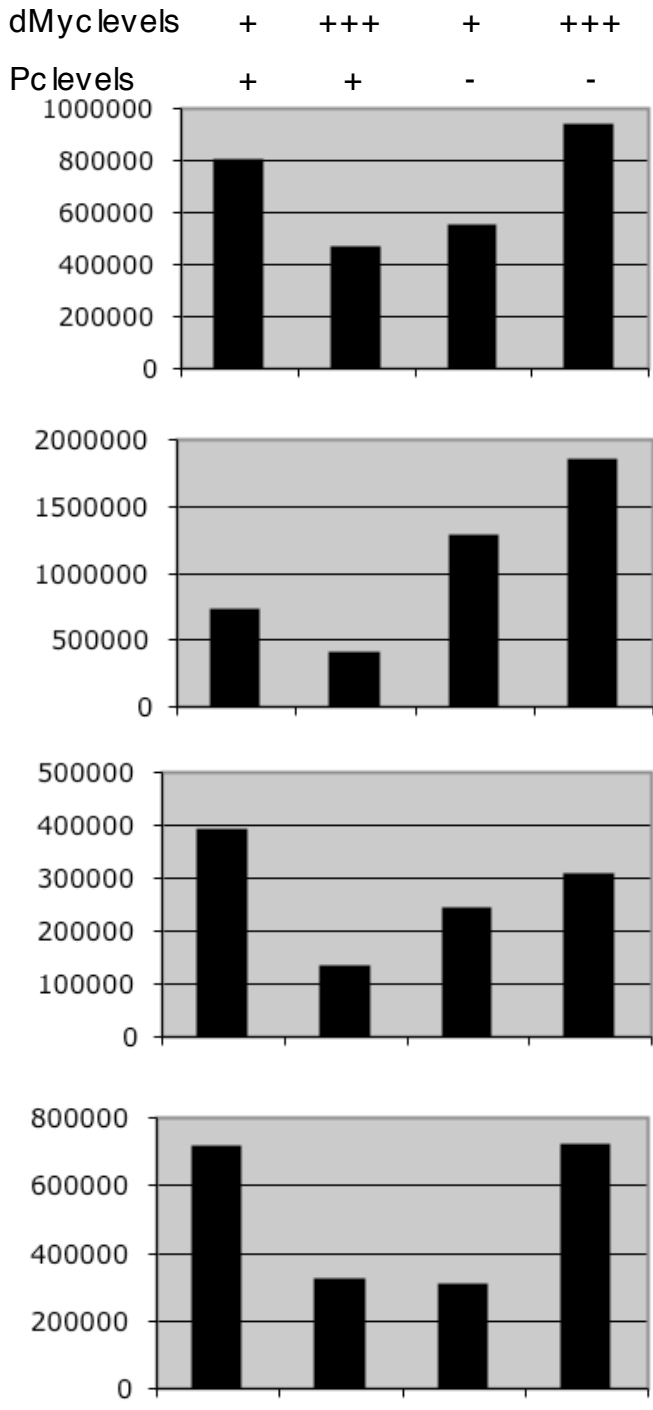

**B**

| Gene                   | dMyc (+), Pc (+) | dMyc (+), Pc (+) | dMyc (-), Pc (-) | dMyc (+), Pc (-) |
|------------------------|------------------|------------------|------------------|------------------|
| hts                    | 261              | 60               | 276              | 183              |
| CG32549 (CG6278)       | 194              | 48               | 408              | 210              |
| CG14036                | 642              | 93               | 976              | 602              |
| Irk3 (CG10369)         | 523              | 76               | 532              | 419              |
| Ras64B                 | 972              | 1093             | 904              | 936              |
| cre (positive control) | 9895             | 12514            | 11768            | 9317             |

Goodliffe, Supplementary Figure 2

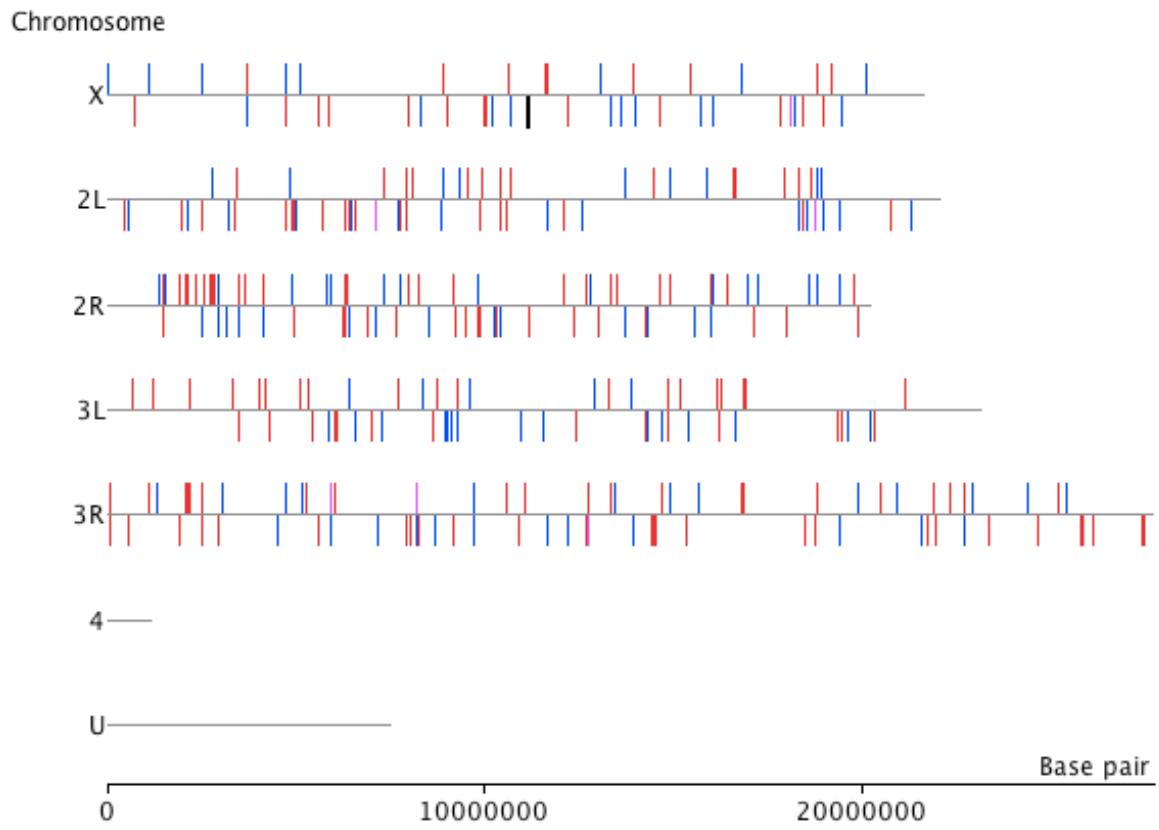

Supplement: genesdev_19_24_2941__1.pdf [file genesdev_19_24_2941__1.pdf]
